# Supplementary material for: Targeting EML4-ALK gene fusion variant 3 in thyroid cancer
Source: PubMed Central journal article supplement (PMC8183637; doi:10.1530/erc-20-0436), 2021-04-20
Supplement: supplementary_figure_2.pdf [file supplementary_figure_2.pdf]

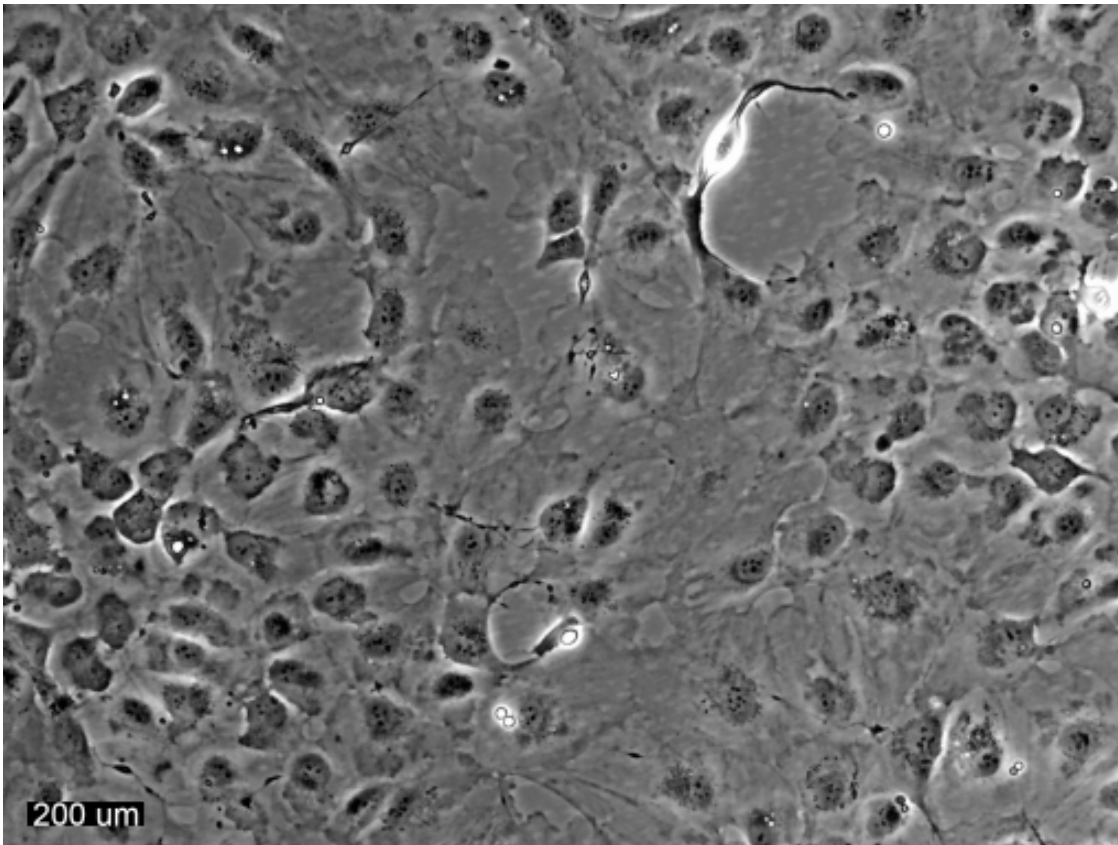

**Supplemental Figure S2.** Example of cancer cell line morphology of JVE404 p27. The newly established cancer cell line grows in monolayer. (Images made with phase-contrast microscope, Axiovert 40 C Zeiss, magnification 100x. Capture made using Moticom 3 (3.0 MP) camera and image software Motic Images Plus 2.0 ML)
