# Supplementary material for: Targeting EML4-ALK gene fusion variant 3 in thyroid cancer
Source: PubMed Central journal article supplement (PMC8183637; doi:10.1530/erc-20-0436), 2021-04-20
Supplement: supplementary_figure_3.pdf [file supplementary_figure_3.pdf]

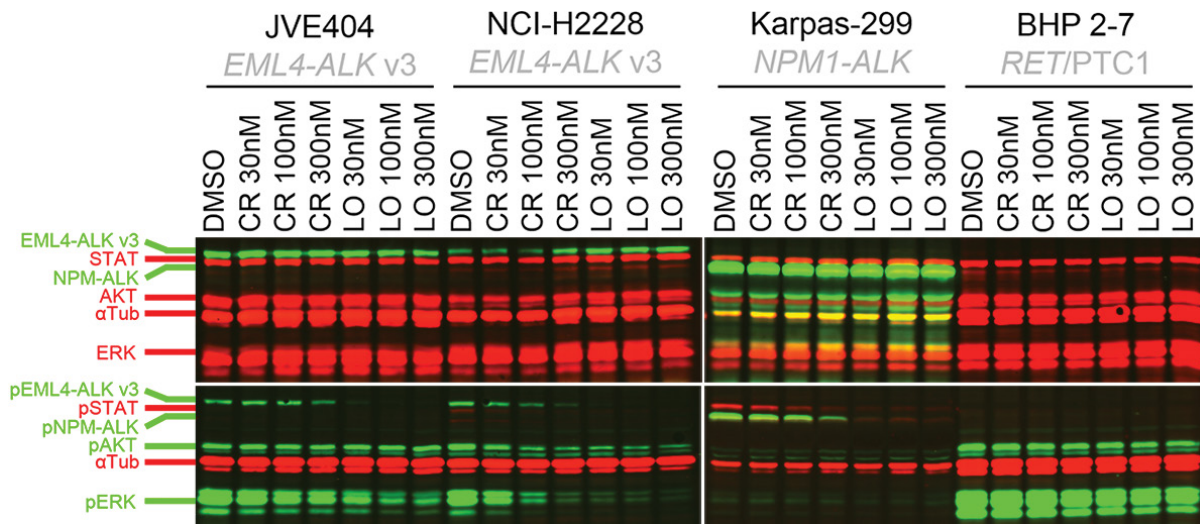

A.

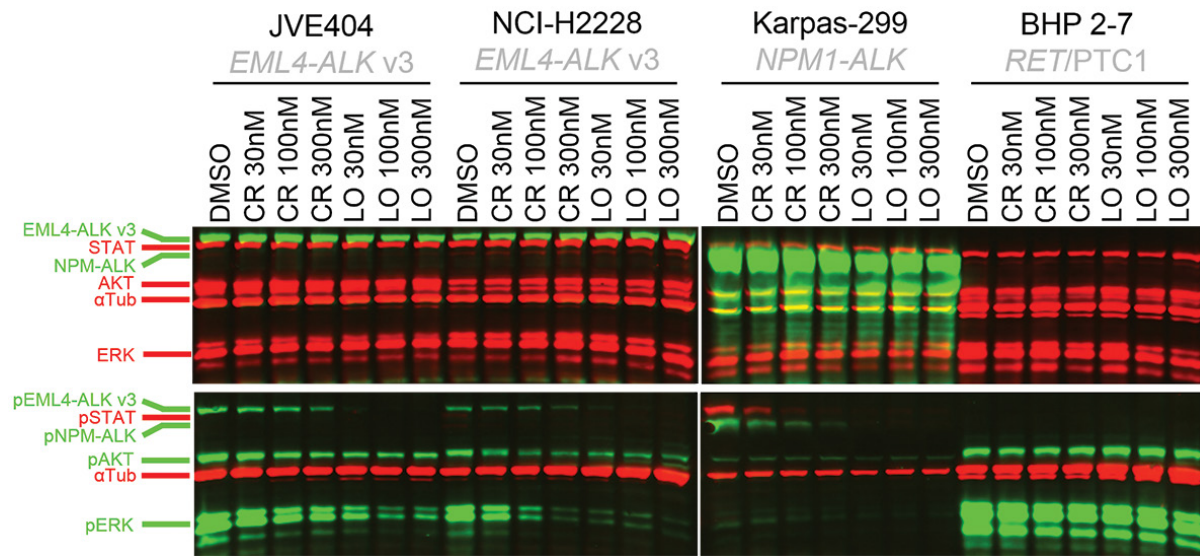

B.

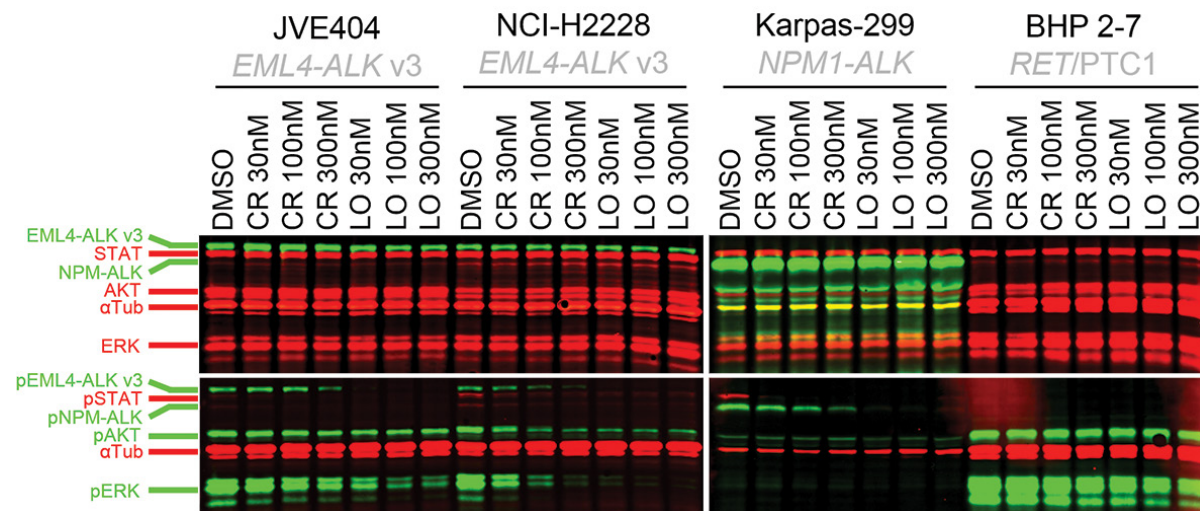

C.

**Supplemental Figure S3.** Western blots repeated thrice. A: The Western blot shown in the manuscript. B: Western blot repeated. C: Western blot repeated.
