# Supplementary material for: Targeting EML4-ALK gene fusion variant 3 in thyroid cancer
Source: PubMed Central journal article supplement (PMC8183637; doi:10.1530/erc-20-0436), 2021-04-20
Supplement: supplementary_figure_6.pdf [file supplementary_figure_6.pdf]

## Rel. baseline expression of phosphorylated proteins

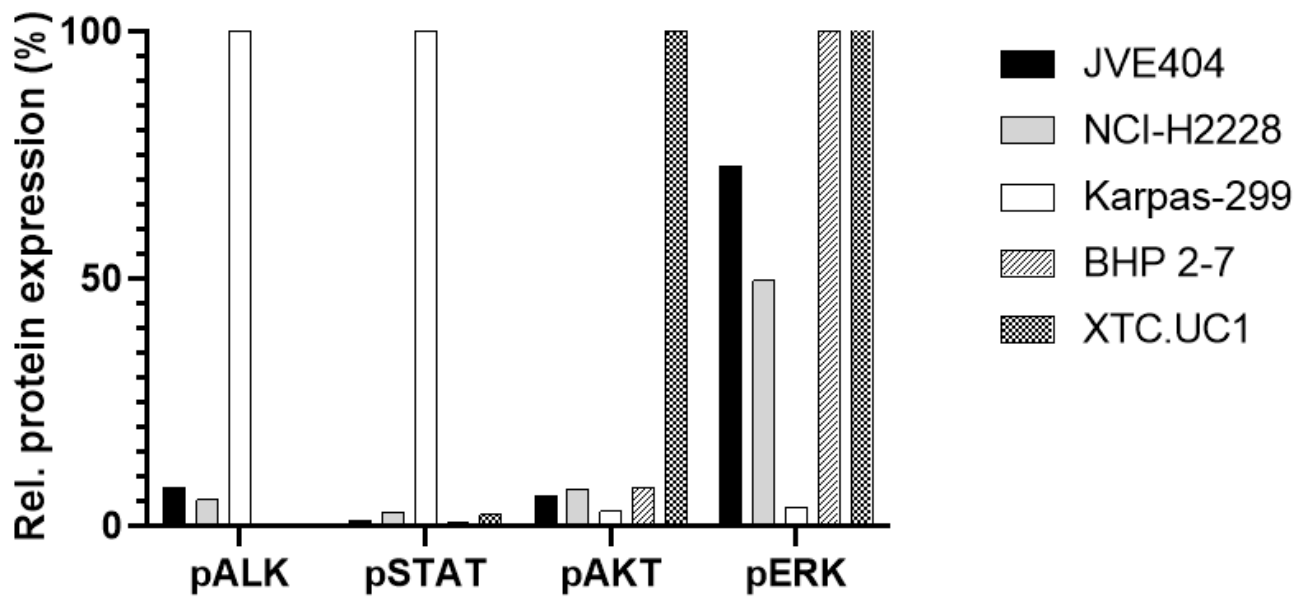

**Supplemental Figure S6.** Quantification of Western blot shown in Supplemental Figure S5. Protein expression in cells treated with DMSO observed in cell lines JVE404, NCI-H2228, Karpas-299, BHP 2-7 and XTC.UC1. The levels of expression of the phosphorylated proteins were normalized to household protein control ( $\alpha$ -Tubulin). Results are shown as percentages of protein expression in the concerning cell line as compared to the cell line with the highest expression level for the corresponding marker (100%). Rel., relative.
